# Supplementary material for: Origin and diffusion of human Y chromosome haplogroup J1-M267
Source: PubMed Central journal article supplement (PMC7987999; doi:10.1038/s41598-021-85883-2), 2021-03-23

## Supplementary Figure S2. Ancient individuals belonging to haplogroup J1-M267

Colors mark the antiquity. Detailed information about the ancient individuals are provided in Supplementary Table S3. The map was generated in RStudio v1.2.5019 (RStudio Team. RStudio: Integrated Development Environment for R. RStudio, Inc., 2019) on the basis of R v3.6.1 (R CoreTeam. R: A language and environment for statistical computing. R Foundation for Statistical Computing, 2019). The base map was downloaded from <http://tapiquen-sig.jimdo.com>.

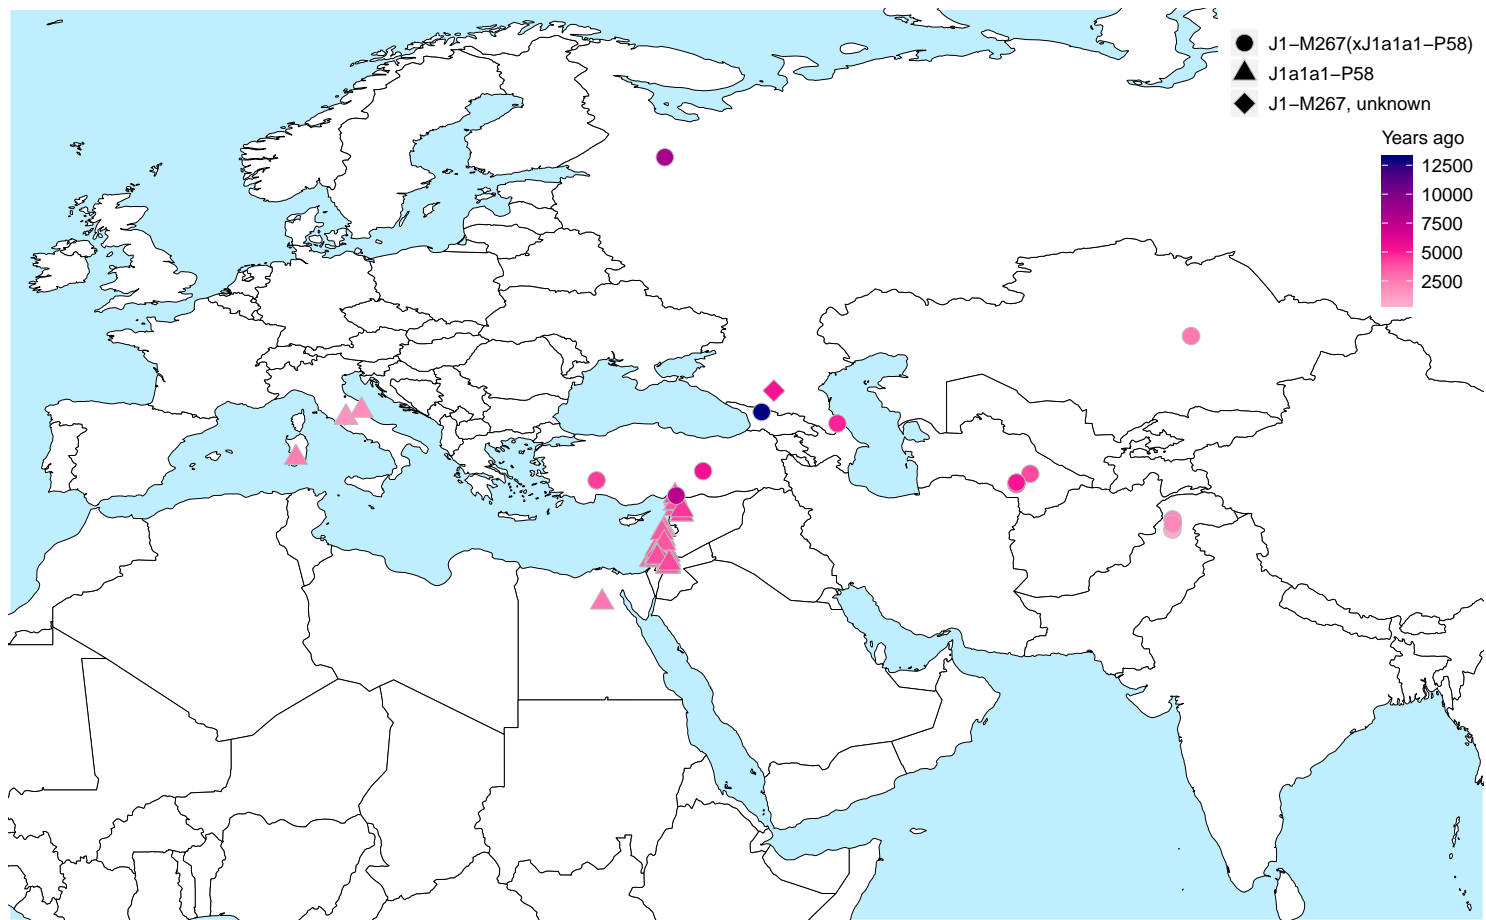

Supplement: 41598_2021_85883_MOESM2_ESM.pdf [file 41598_2021_85883_MOESM2_ESM.pdf]
